# Supplementary material
Source: PubMed Central journal article supplement (PMC7026586)
Supplement: gkz1139_supplemental_file.pdf [file gkz1139_supplemental_file.pdf]

# Supplementary Figure S1.

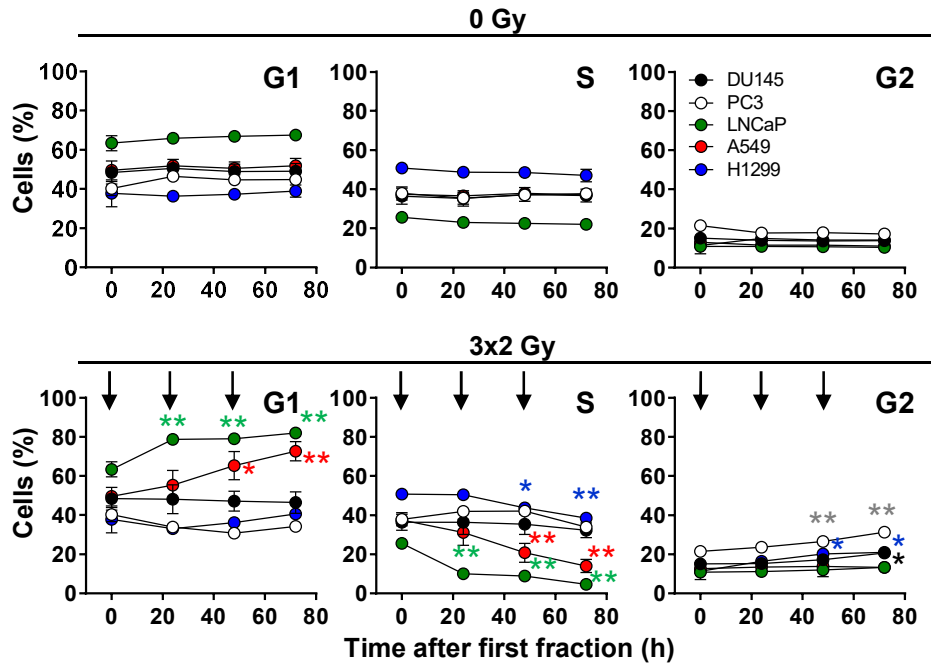

Figure S1. Cell cycle distribution of human prostate and non-small cell lung carcinoma cells during the time course of fractionated radiotherapy (3 fractions of 2 Gy). Unirradiated cells (0 Gy) were used as control. Cells were incubated with BrdU for 10 min at indicated time points. Arrows indicate time of irradiation (2 Gy). Results show mean  $\pm$  STDEV ( $n = 3$ , \*  $P < 0.05$ , \*\*  $P < 0.01$ , Student's t-test).

## Supplementary Figure S2.

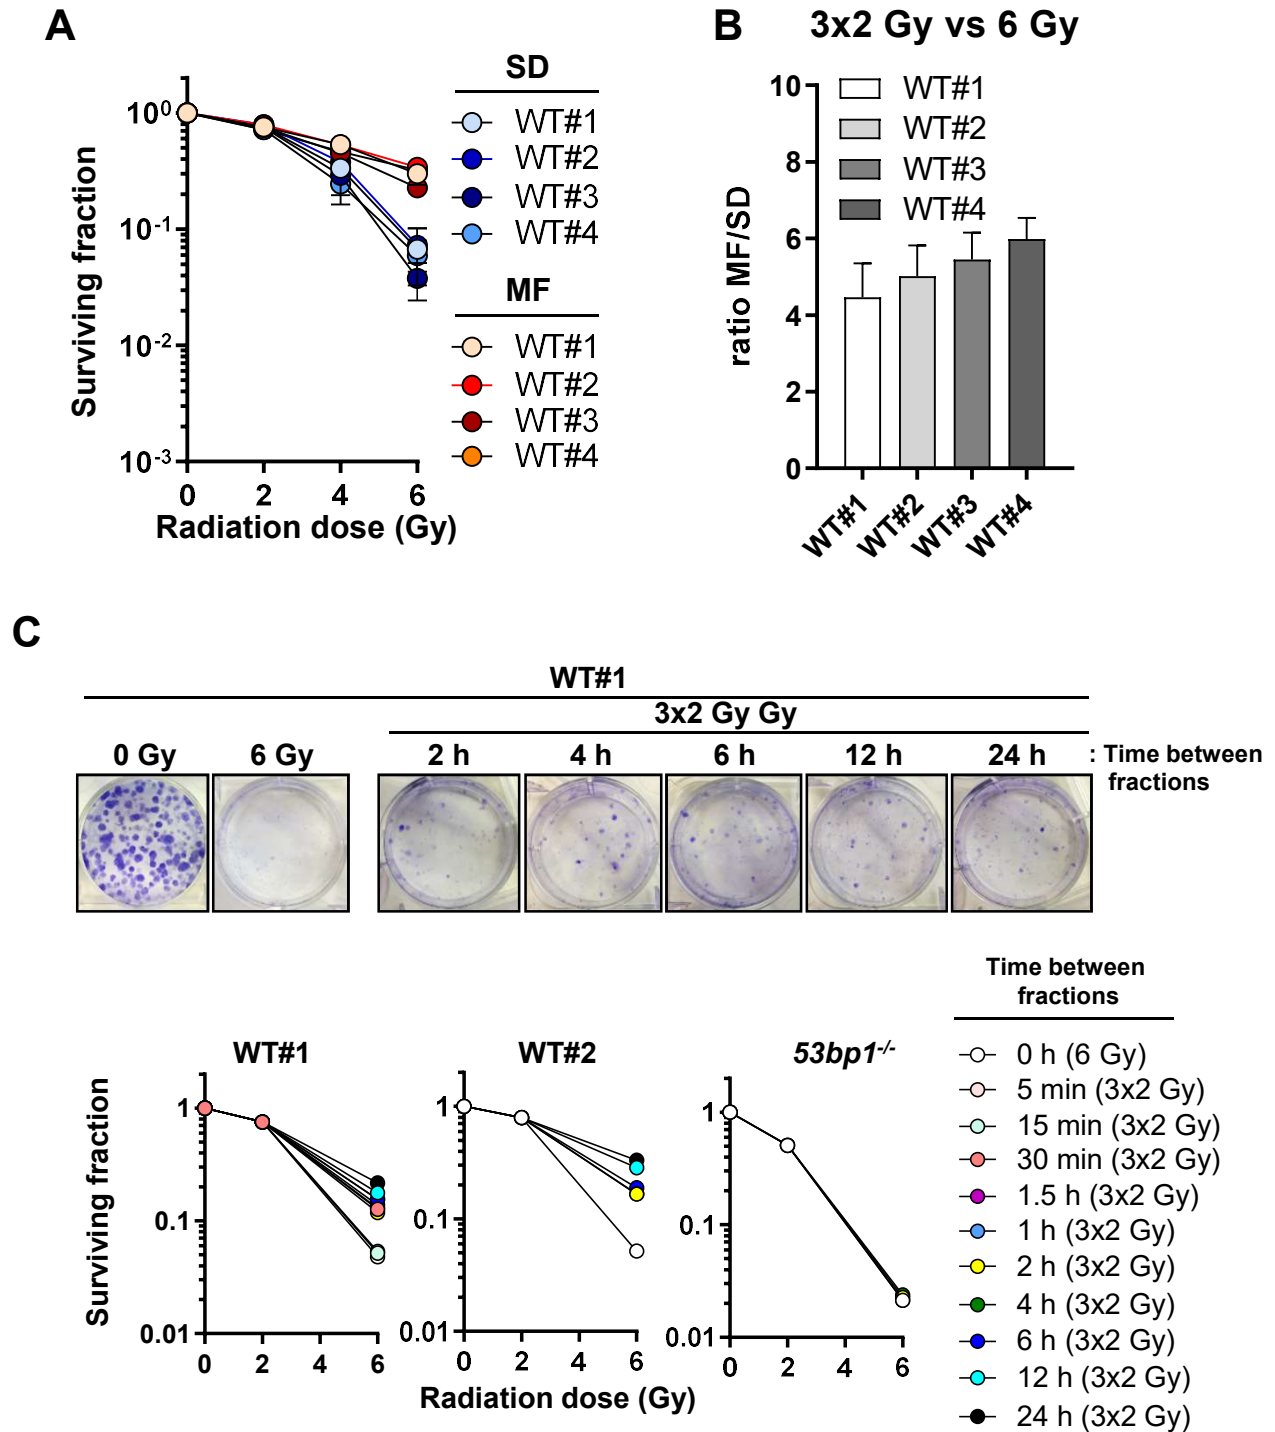

Figure S2. (A) Clonogenic survival and (B) SD/MF ratios of 4 wildtype MEF cell lines. (C) Colony formation assay of WT#1, WT#2, and *53bp1*<sup>-/-</sup> MEF irradiated with 6 Gy single dose or 3 times 2 Gy fractionated radiation with indicated time intervals between fractions. Unirradiated cells were used as control.

### Supplementary Figure S3.

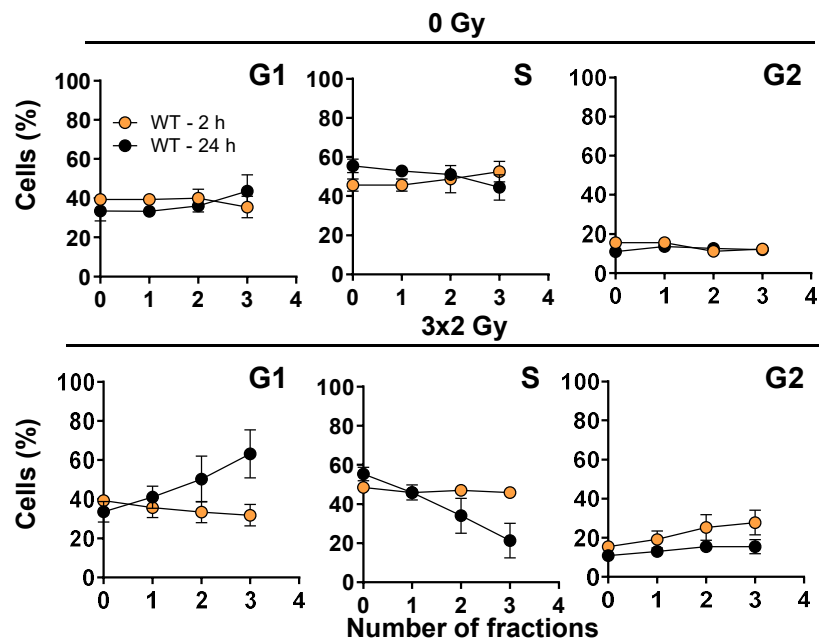

Figure S3. Cell cycle distribution of wildtype (WT) MEF during the course of fractionated radiotherapy (3 fractions of 2 Gy) with a 2 h or 24 h time interval between fractions.

## Supplementary Figure S4.

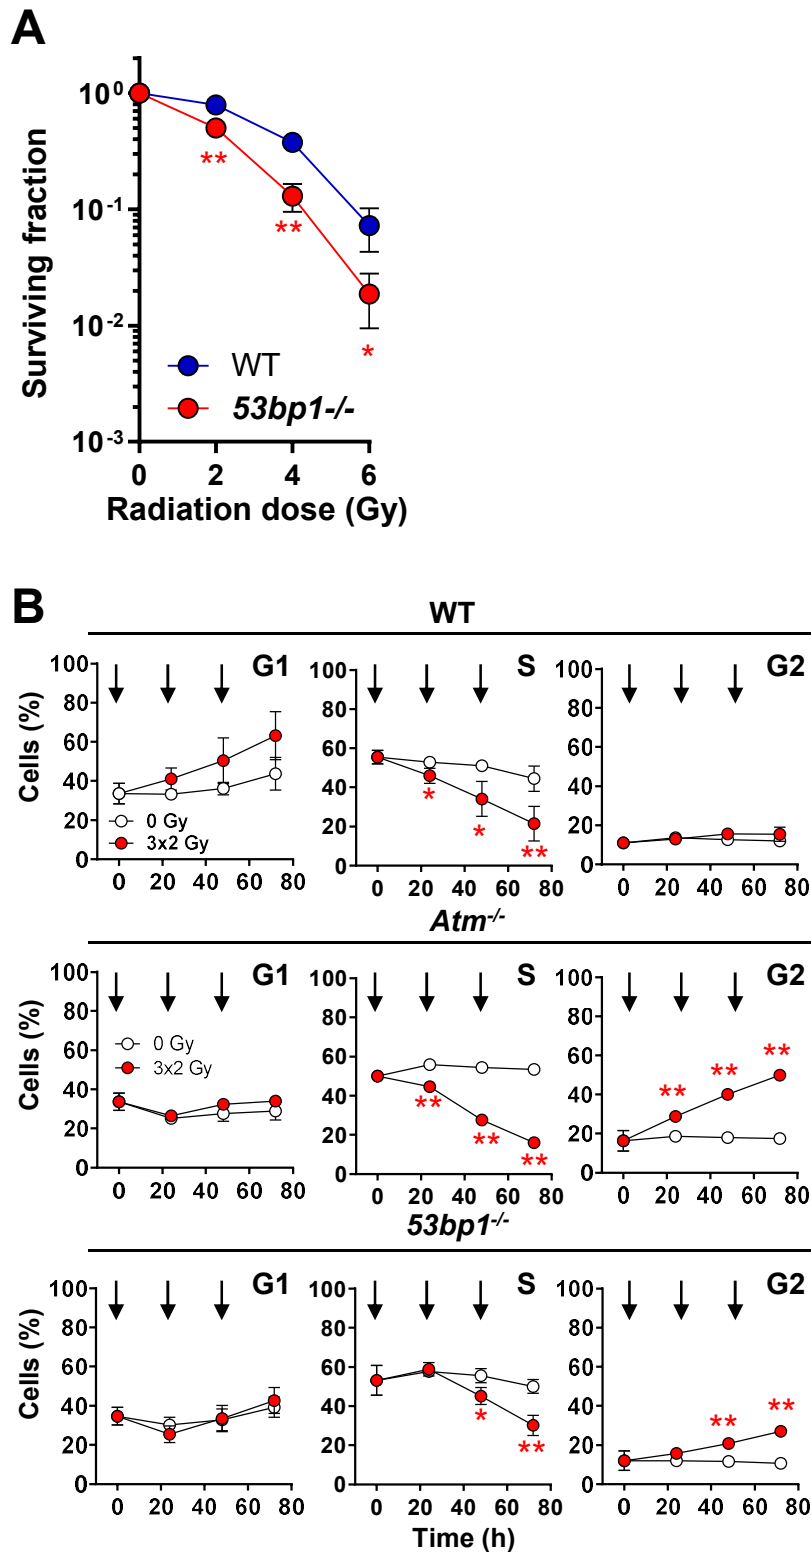

## Supplementary Figure S5.

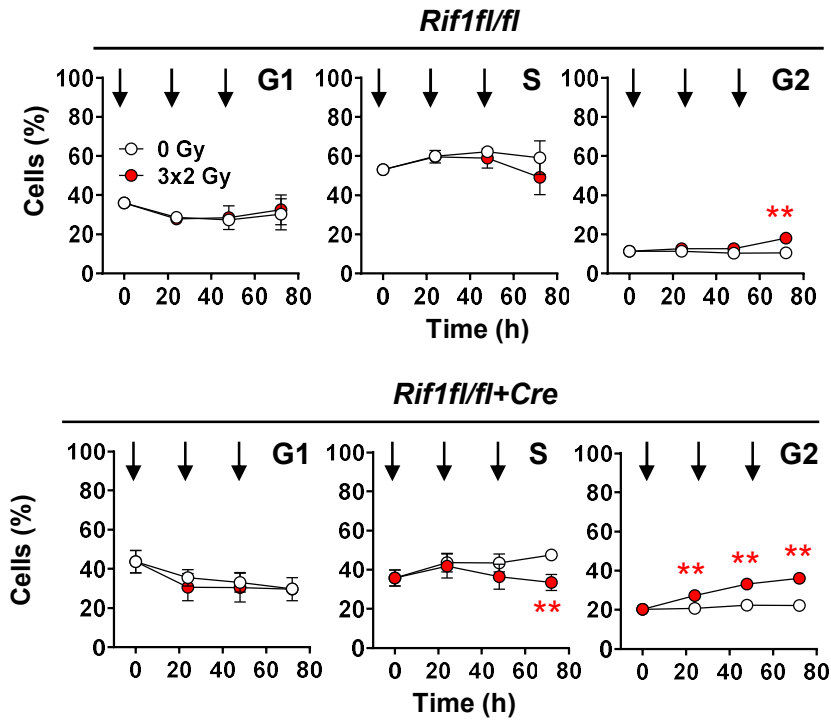

Figure S5. Cell cycle distribution of unirradiated (0 Gy) and irradiated (3 x 2 Gy) *Rif1fl/fl* and *Rif1fl/fl+Cre* at indicated time points during the time course of fractionated radiotherapy (3 fractions of 2 Gy). Cells were incubated with BrdU prior to fixation and staining with Anti-BrdU antibodies. Results show mean  $\pm$  STDEV (n = 3, \*\* P < 0.01, Student's t-test).

## Supplementary Figure S6.

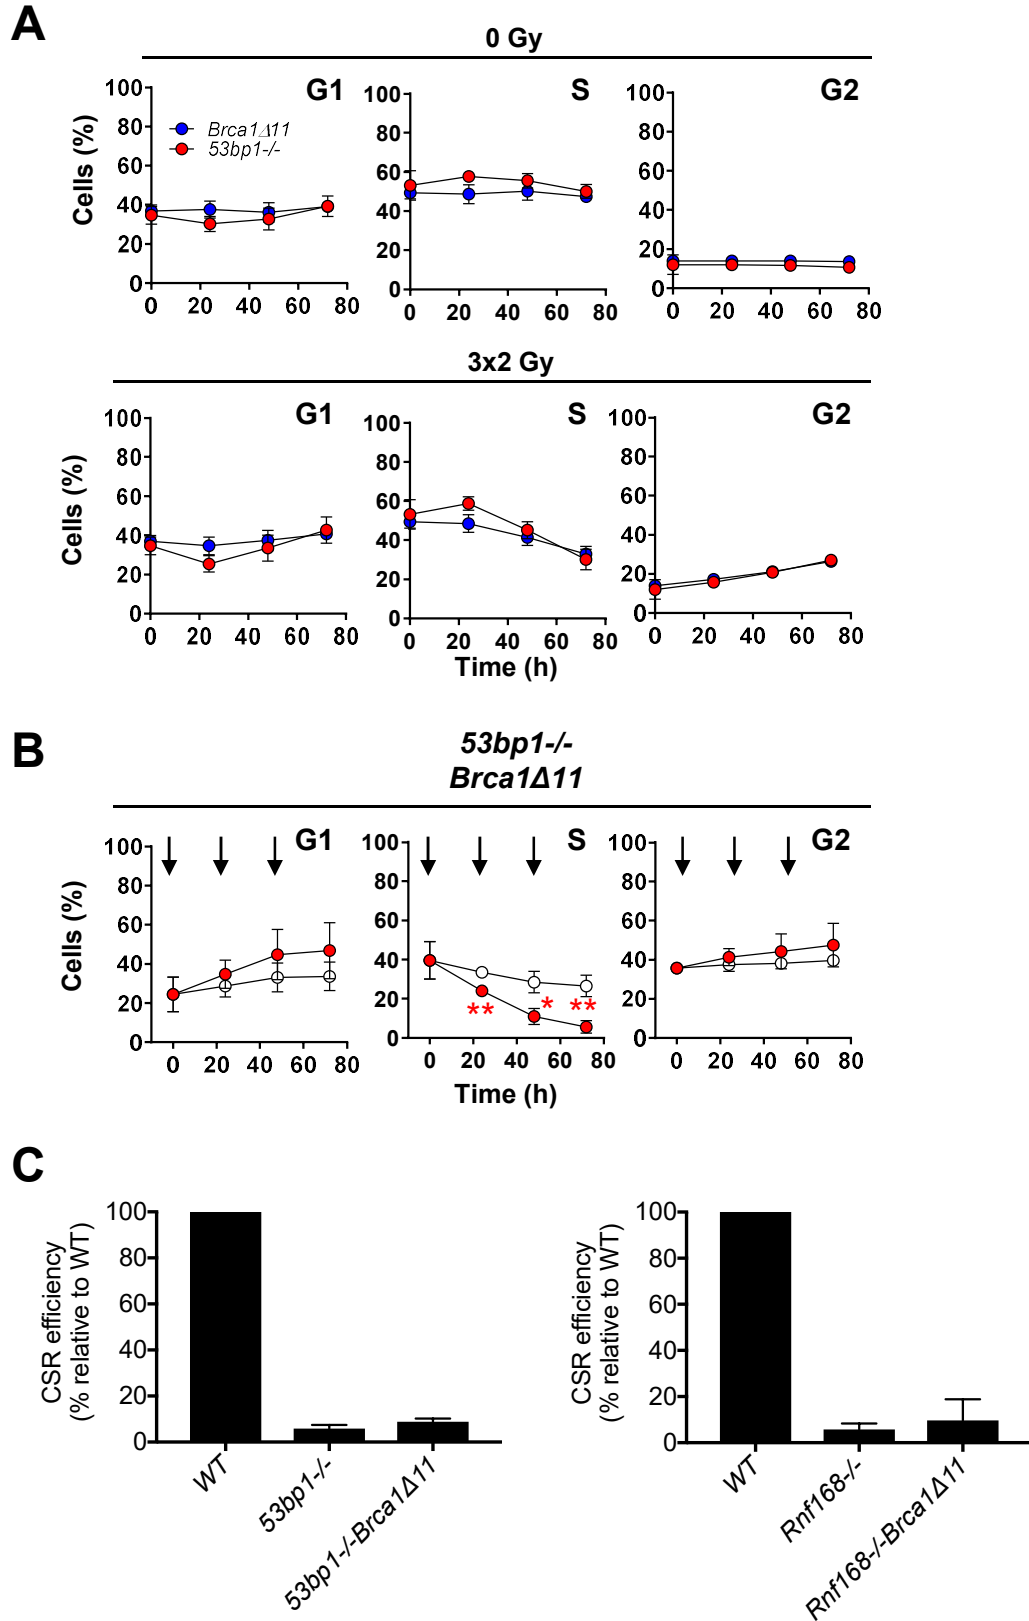

Figure S6. (A) Cell cycle distribution of unirradiated (0 Gy) and irradiated (3 x 2 Gy) *53bp1<sup>-/-</sup>* and *Brca1Δ11* and (B) *53bp1<sup>-/-</sup>Brca1Δ11* cells at indicated time points. Cells were incubated with BrdU prior to fixation and staining with Anti-BrdU antibodies. (C) Class switch recombination (CSR) in wildtype (WT), *53bp1<sup>-/-</sup>*, *53bp1<sup>-/-</sup>Brca1Δ11*, *Rnf168<sup>-/-</sup>*, and *Rnf168<sup>-/-</sup>Brca1Δ11* splenic B cells. WT MEF were used as control. CSR efficiency in WT B cells was set to 100%.

## Supplementary Figure S7.

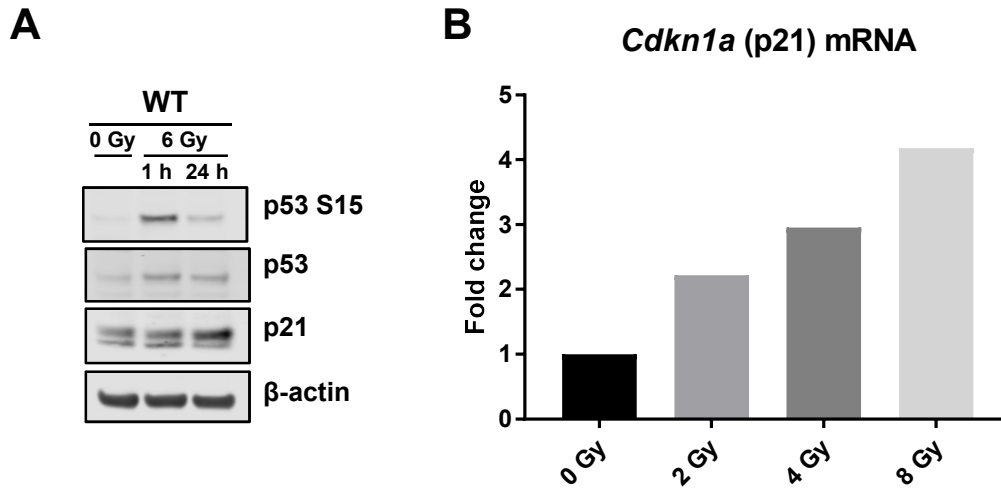

Figure S7. (A) Western blot showing p53 expression and serine-15 phosphorylation as well as p21 expression in wild type (WT) MEF at 1 h or 24 h after a single 6 Gy dose of IR. β-actin served as loading control. (B) Fold change of *Cdkn1a* mRNA expression in WT cells at 24 h after indicated radiation treatment analyzed using qRT-PCR.
